# Supplementary material for: Exercise Promotes Pro-Apoptotic Ceramide Signaling in a Mouse Melanoma Model
Source: MDPI journal article supplement (doi:10.3390/cancers14174306), 2022-09-02
Supplement: s1 [file s1]

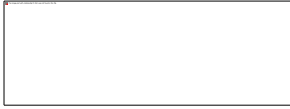

## Supplementary Material

### 1 Supplementary Figures and Tables

#### 1.1 Supplementary Figures

##### 1.1.1 Supplementary Figure S1. Experimental schema

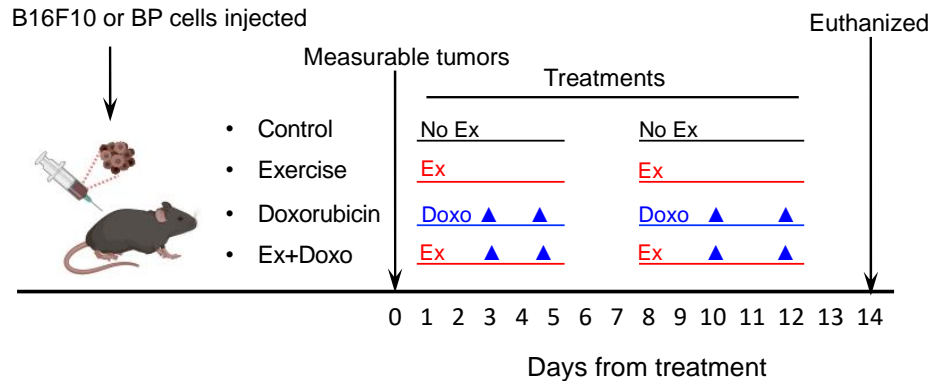

#### Melanoma cell lines

- B16F10: Ink4a/Arf<sup>-/-</sup>, Braf WT, p53 WT
- BP: Braf<sup>V600E</sup>/Pten<sup>-/-</sup>, p53 WT

#### Treatments

- **Ex** (Treadmill running)
  - 12 meter/min ( $\approx 65\%$   $\dot{V}O_{2max}$ , a brisk walk for humans)
  - 45 min/day x 5 days
- **Doxo** ( $\blacktriangle$ )
  - Tail vein injection
  - 2.5 mg/kg x 4 = 10 mg/kg

**Supplementary Figure S1.** Animal experimental schema. C57Bl/6 male mice were injected with B16F10 or BP tumor cells. When tumors were measurable, mice were divided into four groups: control (No Ex or Con), exercise (Ex), doxorubicin (Doxo), or exercise plus doxorubicin (Ex+Doxo). Ex consisted of moderate treadmill running at 12 meters/minute for 45 min for 5 days per week for 2 weeks. Doxo at a concentration of 2.5 mg/kg in 100  $\mu$ L of PBS was intravenously administered four times (twice per week). Tumor volumes were measured every other day. All mice were euthanized at 14 days following the initiation of exercise in the Ex group.

## 1.1.2 Supplementary Figure S2

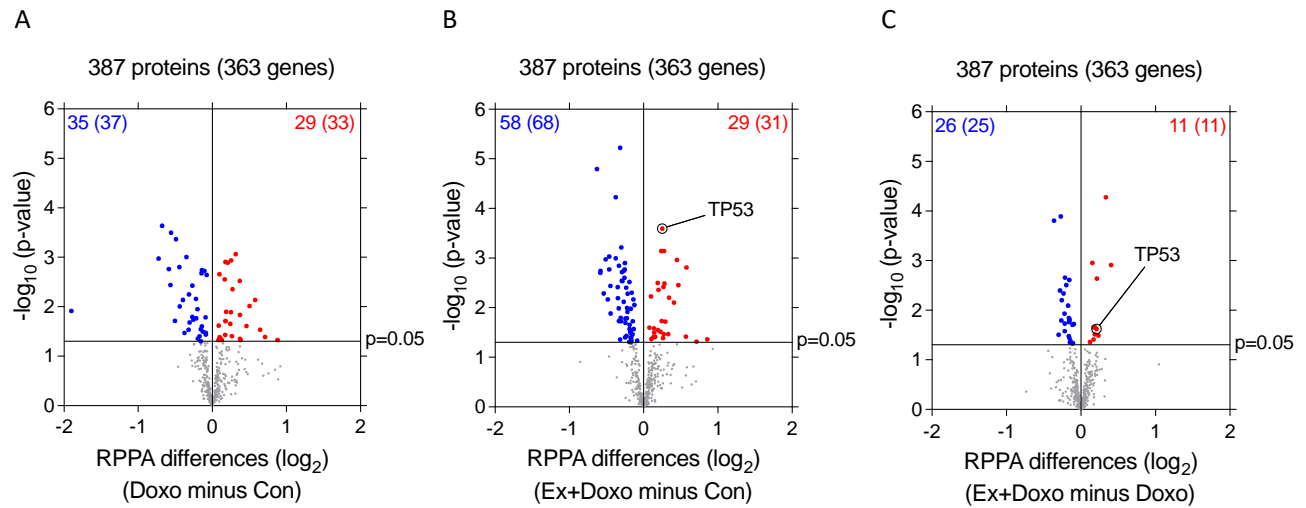

**Supplemental Figure S2. Volcano plot analysis.** (A-C) Volcano plot analyses were performed to identify significant differences of the 387 proteins evaluated in the RPPA protein set between tumors from Doxo vs Con (A), Ex+Doxo vs Con (B), and Ex+Doxo vs Doxo (C) mice. Blue and red indicate downregulated and upregulated proteins on each plot. Horizontal line is p-value set at 0.05.

### 1.1.2 Supplementary Figure S3

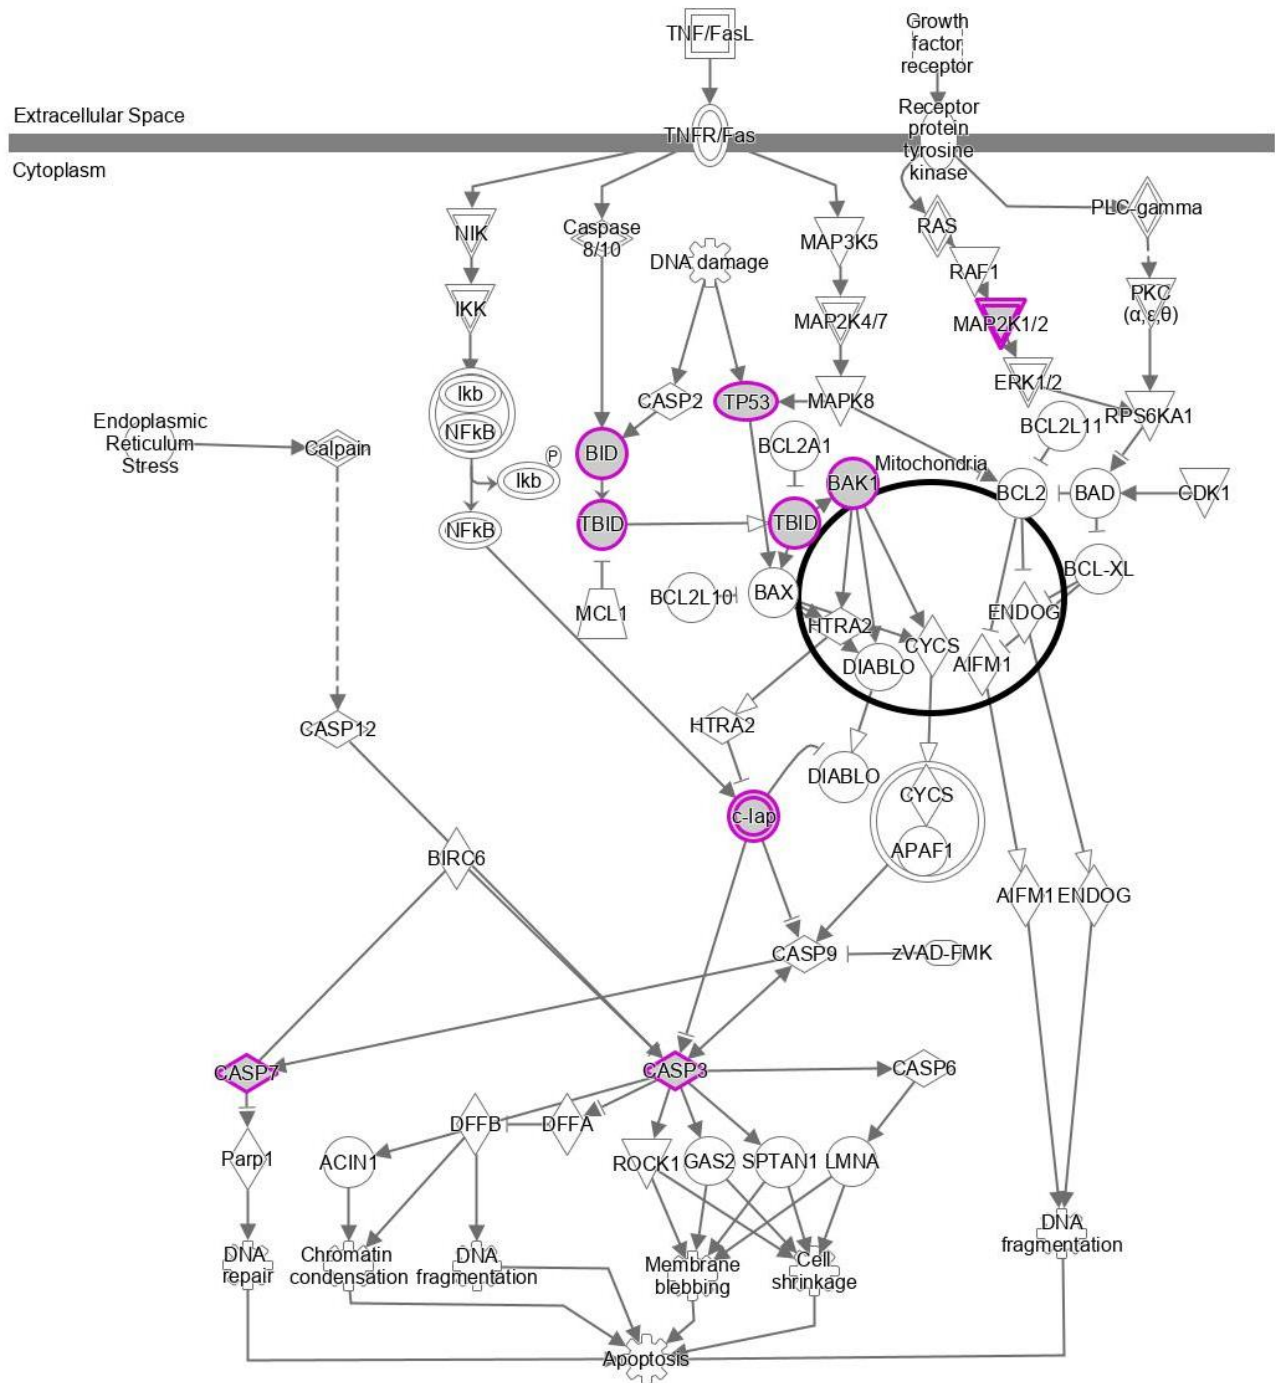

**Supplementary Figure S3.** Gene pathway analysis. IPA (Ingenuity Pathway Analysis) for exercise-induced canonical apoptosis signaling in B16F10 tumors. Significantly regulated proteins are denoted by a pink outline.  $p < 0.05$ .

### 1.1.3 Supplementary Figure S4

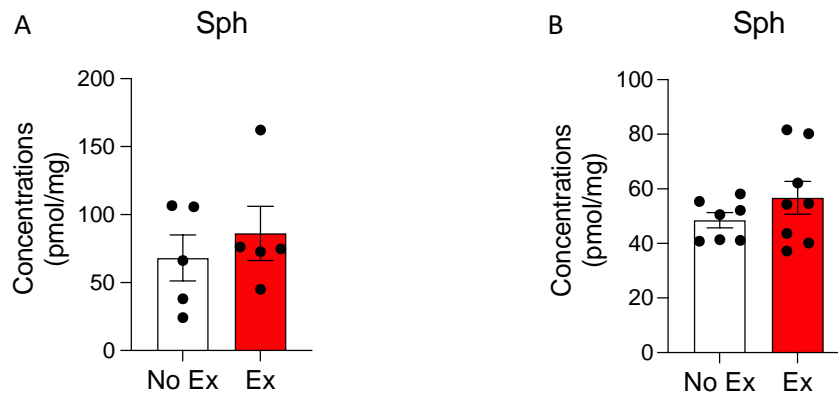

**Supplementary Figure S4.** No effect of exercise on sphingosine (Sph) in tumors. Sph levels in homogenates of B16F10 (**A**) and BP (**B**) tumors were analyzed by LC/MS. Absolute values of sphingosine molecule were represented as mean  $\pm$  SEM in bar graph. Sph: Sphingosine.

### 1.1.4 Supplementary Figure S5

Figure 4C

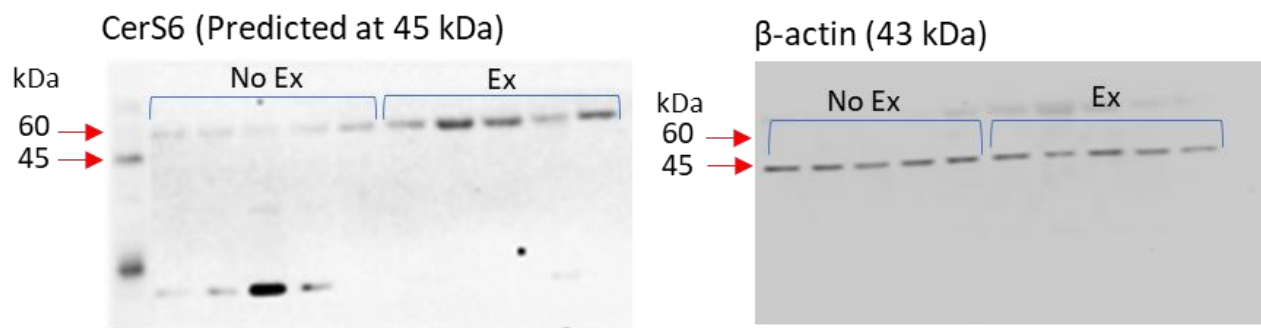

| Absolute intensity |            |           |            |           |            |
|--------------------|------------|-----------|------------|-----------|------------|
| CerS6              | 1          | 2         | 3          | 4         | 5          |
| No Ex              | 3880.669   | 3581.426  | 3821.548   | 4692.205  | 6672.376   |
| Ex                 | 10208.79   | 18843.083 | 14792.083  | 9442.669  | 13224.083  |
|                    |            |           |            |           |            |
| $\beta$ -actin     | 1          | 2         | 3          | 4         | 5          |
| No Ex              | 13970.5947 | 14075.686 | 13709.605  | 14641.686 | 15927.0023 |
| Ex                 | 16280.7167 | 15467.807 | 19953.5787 | 16079.238 | 9733.393   |

| Internal normalization |      |      |      |      |      |
|------------------------|------|------|------|------|------|
| CerS6/ $\beta$ -actin  | 1    | 2    | 3    | 4    | 5    |
| No Ex                  | 0.28 | 0.25 | 0.28 | 0.32 | 0.42 |
| Ex                     | 0.63 | 1.22 | 0.74 | 0.59 | 1.36 |
|                        |      |      |      |      |      |
| 0.31                   | 1    | 2    | 3    | 4    | 5    |
| No Ex                  | 0.90 | 0.82 | 0.90 | 1.03 | 1.35 |
| Ex                     | 2.02 | 3.93 | 2.39 | 1.89 | 4.38 |

| Fold change to NoEx |       |      |  |
|---------------------|-------|------|--|
|                     | Aver. | SEM  |  |
| No Ex               | 1.00  | 0.09 |  |
| Ex                  | 2.92  | 0.51 |  |

Figure 4D

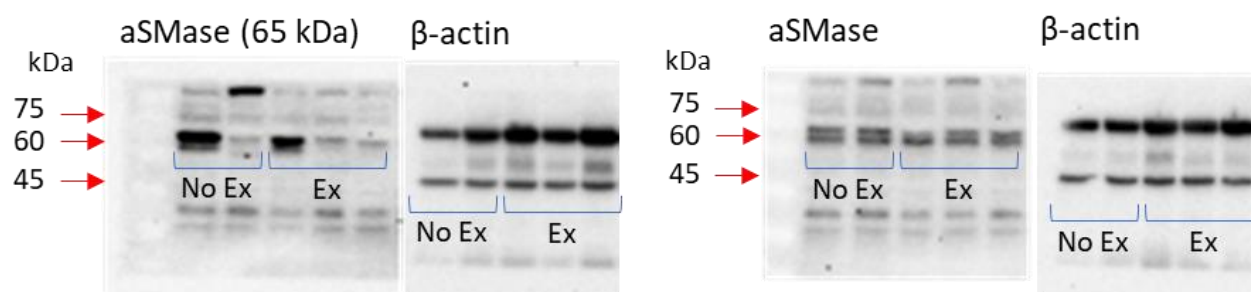

| Absolute intensity |           |           |           |           |           |           |
|--------------------|-----------|-----------|-----------|-----------|-----------|-----------|
| aSMase             | 1         | 2         | 3         | 4         | 5         | 6         |
| No Ex              | 19724.912 | 6604.134  |           | 16858.205 | 18491.841 |           |
| Ex                 | 12947.255 | 6819.719  | 4424.719  | 14190.083 | 15681.548 | 14653.205 |
|                    |           |           |           |           |           |           |
| β-actin            | 1         | 2         | 3         | 4         | 5         | 6         |
| No Ex              | 10712.912 | 11397.841 |           | 10380.326 | 11513.376 |           |
| Ex                 | 14556.376 | 12092.719 | 17045.083 | 14245.083 | 13822.79  | 11651.669 |

| Internal normalization |      |      |      |      |      |      |
|------------------------|------|------|------|------|------|------|
| aSMase/β-actin         | 1    | 2    | 3    | 4    | 5    | 6    |
| No Ex                  | 1.84 | 0.58 |      | 1.62 | 1.61 |      |
| Ex                     | 0.89 | 0.56 | 0.26 | 1.00 | 1.13 | 1.26 |
|                        |      |      |      |      |      |      |
| 1.41                   | 1    | 2    | 3    | 4    | 5    | 6    |
| No Ex                  | 1.30 | 0.41 |      | 1.15 | 1.14 |      |
| Ex                     | 0.63 | 0.40 | 0.18 | 0.71 | 0.80 | 0.89 |

| Fold change to NoEx |       |      |
|---------------------|-------|------|
|                     | Aver. | SEM  |
| No Ex               | 1.00  | 0.20 |
| Ex                  | 0.54  | 0.11 |

Figure 4E

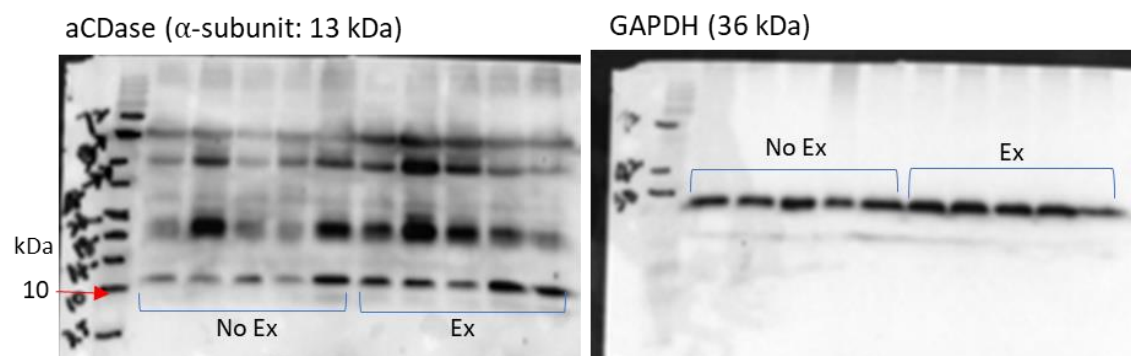

### Absolute intensity

| aCDase | 1          | 2          | 3          | 4          | 5          |
|--------|------------|------------|------------|------------|------------|
| No Ex  | 6216.25483 | 7261.54773 | 14864.5477 | 7021.7193  | 5546.01219 |
| Ex     | 11111.4264 | 10465.3762 | 7070.01219 | 16031.5477 | 12016.8406 |
|        |            |            |            |            |            |
| GAPDH  | 1          | 2          | 3          | 4          | 5          |
| No Ex  | 9755.96194 | 9116.25483 | 14788.8406 | 14319.8406 | 7916.89087 |
| Ex     | 16612.3051 | 17275.0122 | 15179.4264 | 15667.1335 | 8123.37615 |

### Internal normalization

| aCDase/GAP | 1    | 2    | 3    | 4    | 5    |
|------------|------|------|------|------|------|
| No Ex      | 0.64 | 0.80 | 1.01 | 0.49 | 0.70 |
| Ex         | 0.67 | 0.61 | 0.47 | 1.02 | 1.48 |
|            |      |      |      |      |      |
| 0.73       | 1    | 2    | 3    | 4    | 5    |
| No Ex      | 0.88 | 1.10 | 1.38 | 0.68 | 0.96 |
| Ex         | 0.92 | 0.83 | 0.64 | 1.41 | 2.04 |

### Fold change to NoEx

|       | Aver. | SEM  |
|-------|-------|------|
| No Ex | 1.00  | 0.12 |
| Ex    | 1.23  | 0.25 |

Figure 4F

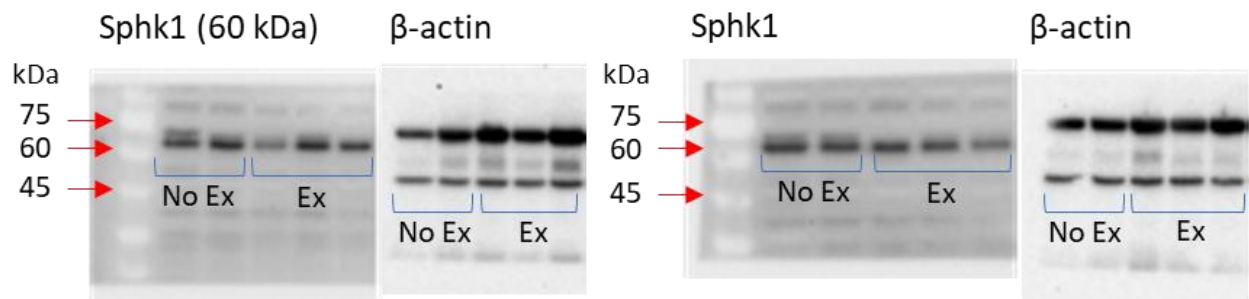

### Absolute intensity

| Sphk1   | 1         | 2         | 3         | 4         | 5         | 6         |
|---------|-----------|-----------|-----------|-----------|-----------|-----------|
| No Ex   | 16479.962 | 16704.962 |           | 19816.79  | 17743.548 |           |
| Ex      | 10123.184 | 16283.134 | 12236.719 | 15584.376 | 13937.79  | 11630.669 |
|         |           |           |           |           |           |           |
| β-actin | 1         | 2         | 3         | 4         | 5         | 6         |
| No Ex   | 10712.912 | 11397.841 |           | 10380.326 | 11513.376 |           |
| Ex      | 14556.376 | 12092.719 | 17045.083 | 14245.083 | 13822.79  | 11651.669 |

### Internal normalization

| Sphk1/β-acti | 1    | 2    | 3    | 4    | 5    | 6    |
|--------------|------|------|------|------|------|------|
| No Ex        | 1.54 | 1.47 |      | 1.91 | 1.54 |      |
| Ex           | 0.70 | 1.35 | 0.72 | 1.09 | 1.01 | 1.00 |
|              |      |      |      |      |      |      |
| 1.61         | 1    | 2    | 3    | 4    | 5    | 6    |
| No Ex        | 0.95 | 0.91 |      | 1.18 | 0.96 |      |
| Ex           | 0.43 | 0.83 | 0.44 | 0.68 | 0.62 | 0.62 |

### Fold change to NoEx

|       | Aver. | SEM  |
|-------|-------|------|
| No Ex | 1.00  | 0.06 |
| Ex    | 0.61  | 0.08 |



Figure 5D

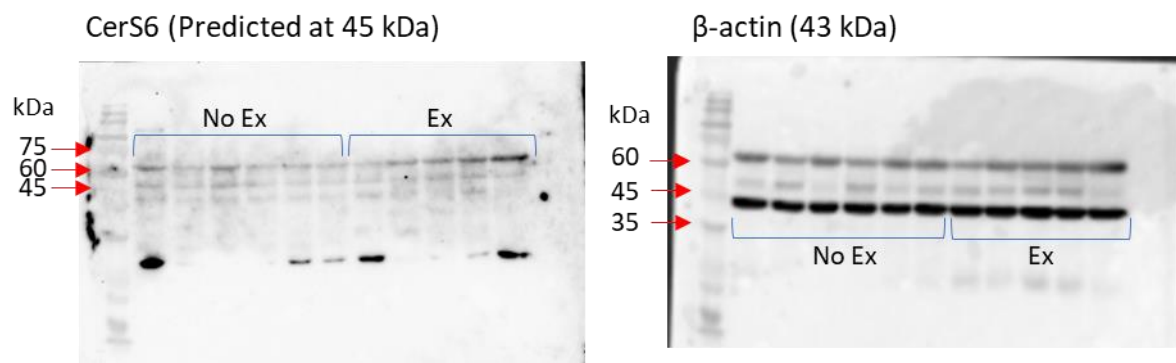

| Absolute intensity |          |          |          |          |          |          |
|--------------------|----------|----------|----------|----------|----------|----------|
| CerS6              | 1        | 2        | 3        | 4        | 5        | 6        |
| No Ex              | 10728.91 | 9033.255 | 11978.84 | 6757.719 | 10636.26 | 8172.79  |
| Ex                 | 13737.84 | 10349.13 | 11537.26 | 6429.426 | 13612.96 |          |
|                    |          |          |          |          |          |          |
| β-actin            | 1        | 2        | 3        | 4        | 5        | 6        |
| No Ex              | 15840.79 | 15640.72 | 13053.55 | 14815.01 | 13295.6  | 12867.84 |
| Ex                 | 13255.13 | 14477.01 | 14399.01 | 15165.43 | 13720.43 |          |

| Internal normalization |      |      |      |      |      |      |
|------------------------|------|------|------|------|------|------|
| CerS6/β-a              | 1    | 2    | 3    | 4    | 5    | 6    |
| No Ex                  | 0.68 | 0.58 | 0.92 | 0.46 | 0.80 | 0.64 |
| Ex                     | 1.04 | 0.71 | 0.80 | 0.42 | 0.99 |      |
|                        |      |      |      |      |      |      |
| 0.68                   | 1    | 2    | 3    | 4    | 5    | 6    |
| No Ex                  | 1.00 | 0.85 | 1.35 | 0.67 | 1.18 | 0.94 |
| Ex                     | 1.53 | 1.06 | 1.18 | 0.63 | 1.46 |      |

| Fold change to control |       |      |
|------------------------|-------|------|
|                        | Aver. | SEM  |
| No Ex                  | 1.00  | 0.10 |
| Ex                     | 1.17  | 0.16 |

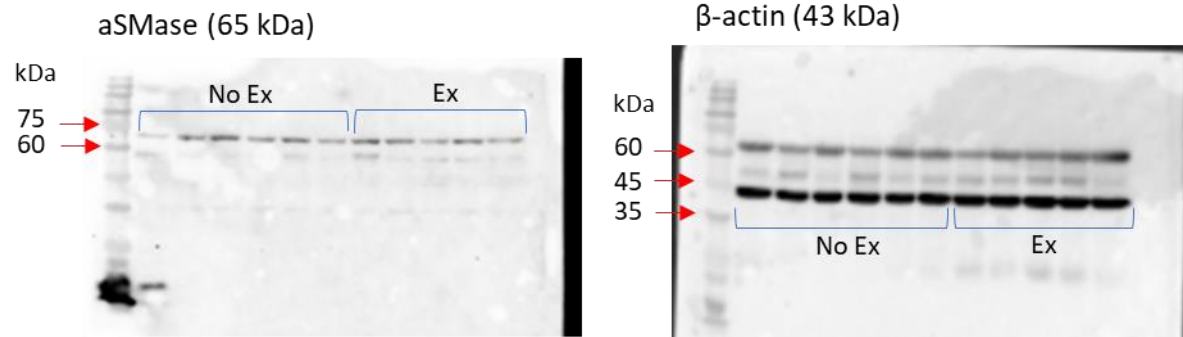

| Absolute intensity |          |          |          |          |          |          |
|--------------------|----------|----------|----------|----------|----------|----------|
| aSMase             | 1        | 2        | 3        | 4        | 5        | 5        |
| No Ex              | 5731.669 | 8312.669 | 5510.426 | 4522.719 | 5247.841 | 7328.426 |
| Ex                 | 10716.13 | 7781.012 | 9152.134 | 8253.426 | 11802.55 |          |
| β-actin            | 1        | 2        | 3        | 4        | 5        | 5        |
| No Ex              | 15840.79 | 15640.72 | 13053.55 | 14815.01 | 13295.6  | 12867.84 |
| Ex                 | 13255.13 | 14477.01 | 14399.01 | 15165.43 | 13720.43 |          |

| Internal normalization |      |      |      |      |      |      |
|------------------------|------|------|------|------|------|------|
| aSMase/<br>β-actin     | 1    | 2    | 3    | 4    | 5    | 6    |
| No Ex                  | 0.36 | 0.53 | 0.42 | 0.31 | 0.39 | 0.57 |
| Ex                     | 0.81 | 0.54 | 0.64 | 0.54 | 0.86 |      |
| 0.43                   | 1    | 2    | 3    | 4    | 5    | 6    |
| No Ex                  | 0.84 | 1.23 | 0.98 | 0.71 | 0.92 | 1.32 |
| Ex                     | 1.88 | 1.25 | 1.48 | 1.26 | 2.00 |      |

| Fold change to control |       |      |
|------------------------|-------|------|
|                        | Aver. | SEM  |
| No Ex                  | 1.00  | 0.10 |
| Ex                     | 1.57  | 0.16 |

aCDase ( $\alpha$ -subunit: 13 kDa)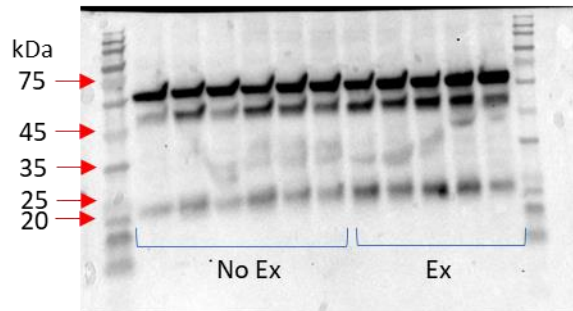 $\beta$ -actin (43 kDa)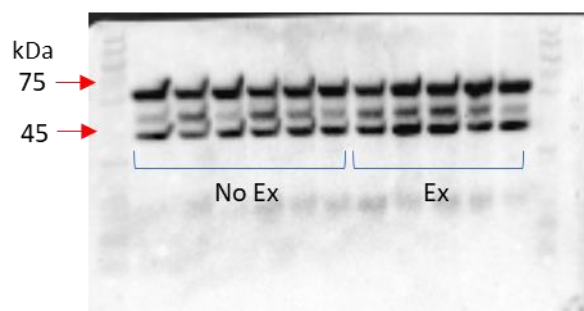**Absolute intensity**

| aCDase<br>alpha<br>subunit | 1        | 2        | 3        | 4        | 5        | 6        |
|----------------------------|----------|----------|----------|----------|----------|----------|
| No Ex                      | 5525.669 | 9296.083 | 6087.305 | 11160.67 | 8934.255 | 8173.719 |
| Ex                         | 13455.38 | 10793.84 | 14284.26 | 12292.01 | 7556.305 |          |
| $\beta$ -actin             | 1        | 2        | 3        | 4        | 5        | 6        |
| No Ex                      | 15840.79 | 15640.72 | 13053.55 | 14815.01 | 13295.6  | 12867.84 |
| Ex                         | 13255.13 | 14477.01 | 14399.01 | 15165.43 | 13720.43 |          |

**Internal normalization**

| aCDase<br>alpha/ $\beta$ -<br>actin | 1    | 2    | 3    | 4    | 5    | 6    |
|-------------------------------------|------|------|------|------|------|------|
| No Ex                               | 0.35 | 0.59 | 0.47 | 0.75 | 0.67 | 0.64 |
| Ex                                  | 1.02 | 0.75 | 0.99 | 0.81 | 0.55 |      |
| 0.58                                | 1    | 2    | 3    | 4    | 5    | 6    |
| No Ex                               | 0.60 | 1.03 | 0.81 | 1.30 | 1.16 | 1.10 |
| Ex                                  | 1.76 | 1.29 | 1.72 | 1.40 | 0.95 |      |

**Fold change to No Ex**

|       | Aver. | SEM  |
|-------|-------|------|
| No Ex | 1.00  | 0.12 |
| Ex    | 1.42  | 0.15 |

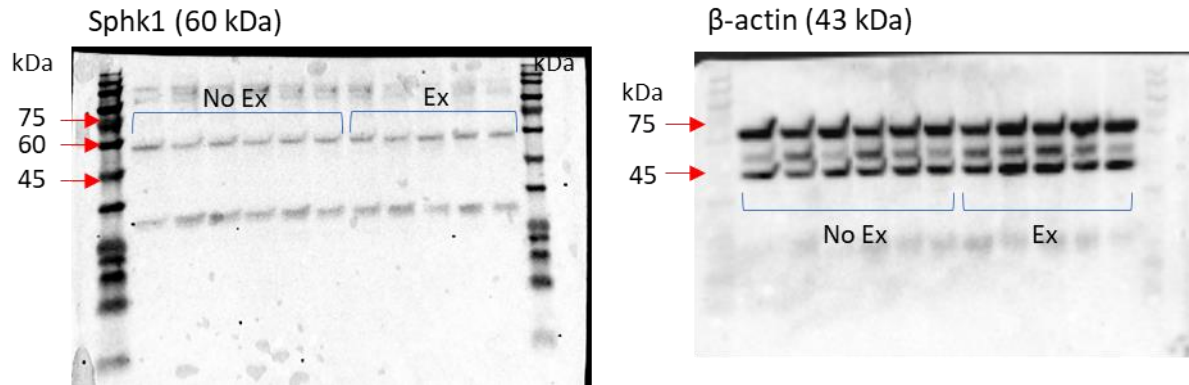

| Absolute intensity |          |          |          |          |          |          |
|--------------------|----------|----------|----------|----------|----------|----------|
| Sphk1              | 1        | 2        | 3        | 4        | 5        | 5        |
| No Ex              | 17397.08 | 13627.38 | 10251.55 | 9822.426 | 8902.719 | 8115.426 |
| Ex                 | 8225.426 | 8774.426 | 14493.43 | 9893.719 | 7678.426 |          |
|                    |          |          |          |          |          |          |
| β-actin            | 1        | 2        | 3        | 4        | 5        | 5        |
| No Ex              | 15840.79 | 15640.72 | 13053.55 | 14815.01 | 13295.6  | 12867.84 |
| Ex                 | 13255.13 | 14477.01 | 14399.01 | 15165.43 | 13720.43 |          |

| Internal normalization |      |      |      |      |      |      |
|------------------------|------|------|------|------|------|------|
| Sphk1/β-actin          | 1    | 2    | 3    | 4    | 5    | 6    |
| No Ex                  | 1.10 | 0.87 | 0.79 | 0.66 | 0.67 | 0.63 |
| Ex                     | 0.62 | 0.61 | 1.01 | 0.65 | 0.56 |      |
|                        |      |      |      |      |      |      |
| 0.79                   | 1    | 2    | 3    | 4    | 5    | 6    |
| No Ex                  | 1.40 | 1.11 | 1.00 | 0.84 | 0.85 | 0.80 |
| Ex                     | 0.79 | 0.77 | 1.28 | 0.83 | 0.71 |      |

| Fold change to control |       |      |
|------------------------|-------|------|
|                        | Aver. | SEM  |
| No Ex                  | 1.00  | 0.09 |
| Ex                     | 0.88  | 0.10 |

Supplementary Figure S5. Uncropped blots.

### 1.2.1 Supplementary Table

**Supplementary Table S1.** Enriched canonical pathways in IPA (Attached in Excel file).

**Supplementary Table S2.** Absolute concentration of ceramide species (pmol/mg) in BP melanoma tumor homogenates. \*  $p < 0.05$  vs No Ex. (Attached in Excel file).

**Supplementary Table S3:** Enriched canonical pathways in IPA. (Attached in Excel file).

**Supplementary Table S4:** Absolute concentration of ceramide species (pmol/mg) in BP melanoma tumors.

| Ceramide species | No Ex (n=7)       | Ex (n=8)          |
|------------------|-------------------|-------------------|
| C14              | $6.7 \pm 1.2$     | $6.2 \pm 0.9$     |
| dhC16            | $12.1 \pm 1.3$    | $8.9 \pm 0.9^*$   |
| C16              | $307.9 \pm 25.8$  | $326.5 \pm 12.3$  |
| C18              | $20.3 \pm 3.0$    | $14.8 \pm 0.6$    |
| C18:1            | $1.8 \pm 0.5$     | $3.0 \pm 0.6$     |
| C20              | $22.3 \pm 2.9$    | $16.0 \pm 1.5$    |
| C20:1            | $0.4 \pm 0.1$     | $0.8 \pm 0.2$     |
| C22              | $34.8 \pm 3.0$    | $38.1 \pm 4.1$    |
| C22:1            | $11.1 \pm 0.8$    | $11.5 \pm 1.3$    |
| C24              | $124.8 \pm 7.0$   | $127.9 \pm 29.7$  |
| C24:1            | $520.8 \pm 38.0$  | $571.7 \pm 29.7$  |
| C26              | $0.5 \pm 0.1$     | $0.5 \pm 0.1$     |
| C26:1            | $4.4 \pm 0.5$     | $4.7 \pm 0.4$     |
| Sum              | $1067.9 \pm 70.2$ | $1130.5 \pm 51.6$ |
